# Supplementary material for: Discovery of a nasal spray steroid, tixocortol, as an inhibitor of SARS-CoV-2 main protease and viral replication
Source: Royal Society of Chemistry journal article supplement (doi:10.1039/d4md00454j), 2024-01-01
Supplement: d4md00454j1.pdf [file d4md00454j1.pdf]

# Discovery of a Nasal Spray Steroid, Tixocortol, as an Inhibitor SARS-CoV-2 Main Protease and Viral Replication

Davis et al.

## Supplemental Files

Fig. S1

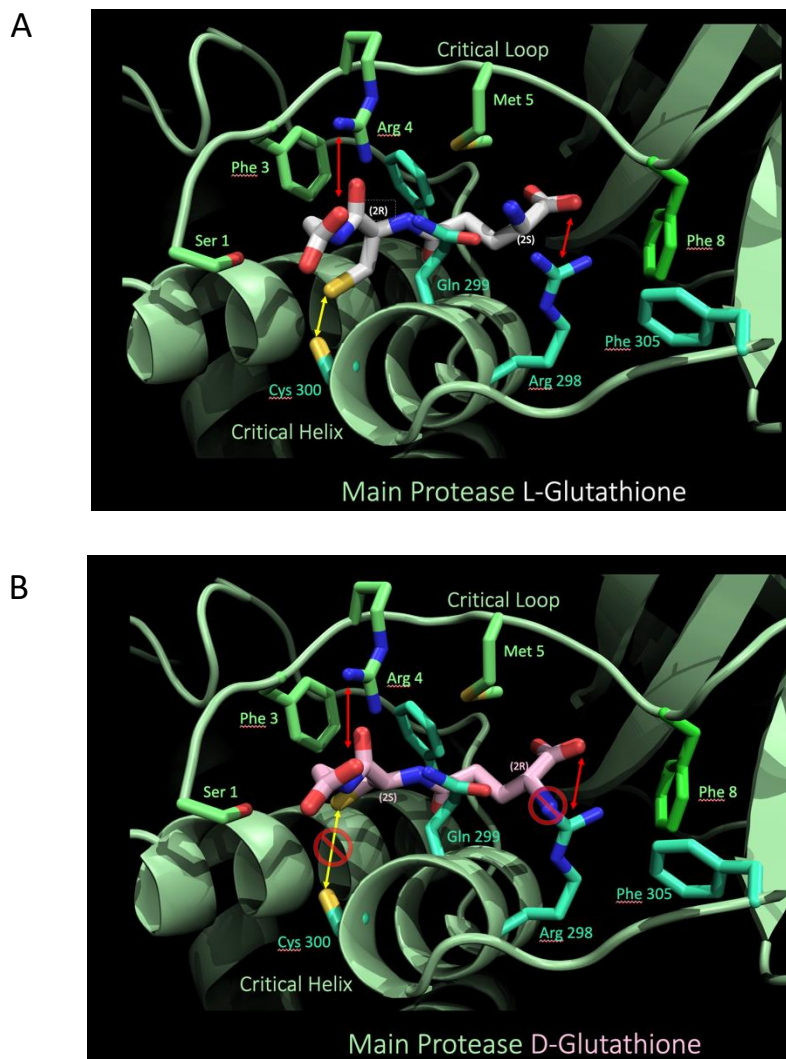

**Fig. S1: Docking of L-glutathione and D-glutathione at the Cys300 pocket in SARS-CoV-2 M<sup>pro</sup>.** M<sup>pro</sup> (showing one monomer of the dimer) is in green (PDB 7AXM) with (A) L-glutathione in stick model as red (oxygens), white (carbons), blue (nitrogens) or with (B) D-glutathione in pink (carbons), red (oxygens) and blue (nitrogens). The sulfhydryl groups are shown in yellow. Yellow arrows indicate potential disulfide bonds and red arrows indicate salt bridges for each glutathione form. In this model, L-glutathione forms favorable interactions from side chains on a critical loop and a critical helix. Once desolvated, the L-glutathione binding mode (A) is first dominated by salt bridge formations (Arg4 and Arg298). This places the 2S configuration of the L-glutathione sulfhydryl at a 2.54 angstrom distance from the Cys300 sulfhydryl, where a disulfide bond can easily form. By contrast (B), the D-glutathione 2S configuration of the sulfhydryl is too far away (5.48 angstroms) to form the Cys300-D-glutathione disulfide bond. The model also suggests that the 2R configuration of the amino group for D-glutathione forms unfavorable steric clashes if a salt bridge with the Arg 298 side chain were to form. See electronic supplemental information text for detailed description of model development†.

Table S1

|                 |                        | <b>A</b>          | <b>B</b>                                    | <b>C</b>                     |
|-----------------|------------------------|-------------------|---------------------------------------------|------------------------------|
| <b>Compound</b> | <b>Name</b>            | <b>Dock Score</b> | <b>M<sup>pro</sup> Activity (% control)</b> | <b>Covalent modification</b> |
| DB02025         | Acv tripeptide         | -4.769            | 159 +/- 7                                   | no                           |
| DB00886         | Omapatrilat            | -4.504            | 99 +/- 11                                   | no                           |
| DB08766         | Zofenoprilat           | -4.359            | 147 +/- 10                                  | trace                        |
| DB03912         | Phosphopantetheine     | -4.34             | 163 +/- 13                                  | non                          |
| DB08626         | (S)-THIORPHAN          | -4.302            | 134 +/- 10                                  | no                           |
| DB01197         | Captopril              | -4.217            | 151 +/- 14                                  | no                           |
| DB02032         | Epicaptopril           | -4.152            | 206 +/- 68                                  | no                           |
| DB12160         | bucillamine            | -4.083            | 167 +/- 19                                  | no                           |
| <b>DB09091</b>  | <b>Tixocortol</b>      | <b>-3.829</b>     | <b>20 +/- 11</b>                            | <b>yes</b>                   |
| DB11164         | Bicisate               | -3.279            | 119 +/- 6                                   | no                           |
| DB12192         | Emeramide              | -2.681            | 142 +/- 16                                  | no                           |
| DB03760         | (R)-dihydrolipoic acid | -1.06             | 95 +/- 14                                   | no                           |

**Table S1: List of compounds identified based on docking prediction at Cys300 pocket in SARS-CoV-2 M<sup>pro</sup> and their ability covalently modify M<sup>pro</sup> and affect M<sup>pro</sup> activity.** Pipeline Pilot produced 72 compounds with -SH groups that could potentially dock at Cys300. To determine the feasibility of covalent binding, these thiol compounds were covalently docked into the SARS-CoV-2 M<sup>pro</sup> crystal structure. Maestro 12.7 was used to prepare the template crystal structure 7MHI. We identified 15 compounds with docking scores favorable for the Cys300 pocket and 13 of these compounds were obtained for testing. **(A)** Docking scores obtained using Covalent Docking module to model the covalent ligand-protein complex using the reactive residue set at Cys300. Reaction Type of Disulfide Formation, and Docking Mode set at Virtual Screening. Note that glutathione's docking score (not shown) was -4.213. **(B)** M<sup>pro</sup> activity was measured using a peptide based HPLC assay using 100 nM M<sup>pro</sup> and 50  $\mu$ M of each drug (see supplemental slide 1). Drugs were incubated for 1-hr then the assay was started with addition of peptide substrate and stopped after 10 minutes. Products were determined by measuring their absorbance at 205. Control was 5% DMSO and all samples contained 5% DMSO in assay. Note that only tixocortol showed significant inhibitory activity against M<sup>pro</sup> while most others showed increased activity. **(C)** Each compound (50  $\mu$ M) was incubated with M<sup>pro</sup> (5  $\mu$ M) for 1 hr in assay buffer and then analyzed by SEC/MS to assess covalent modification based on the amu for M<sup>pro</sup> species.

Fig. S2

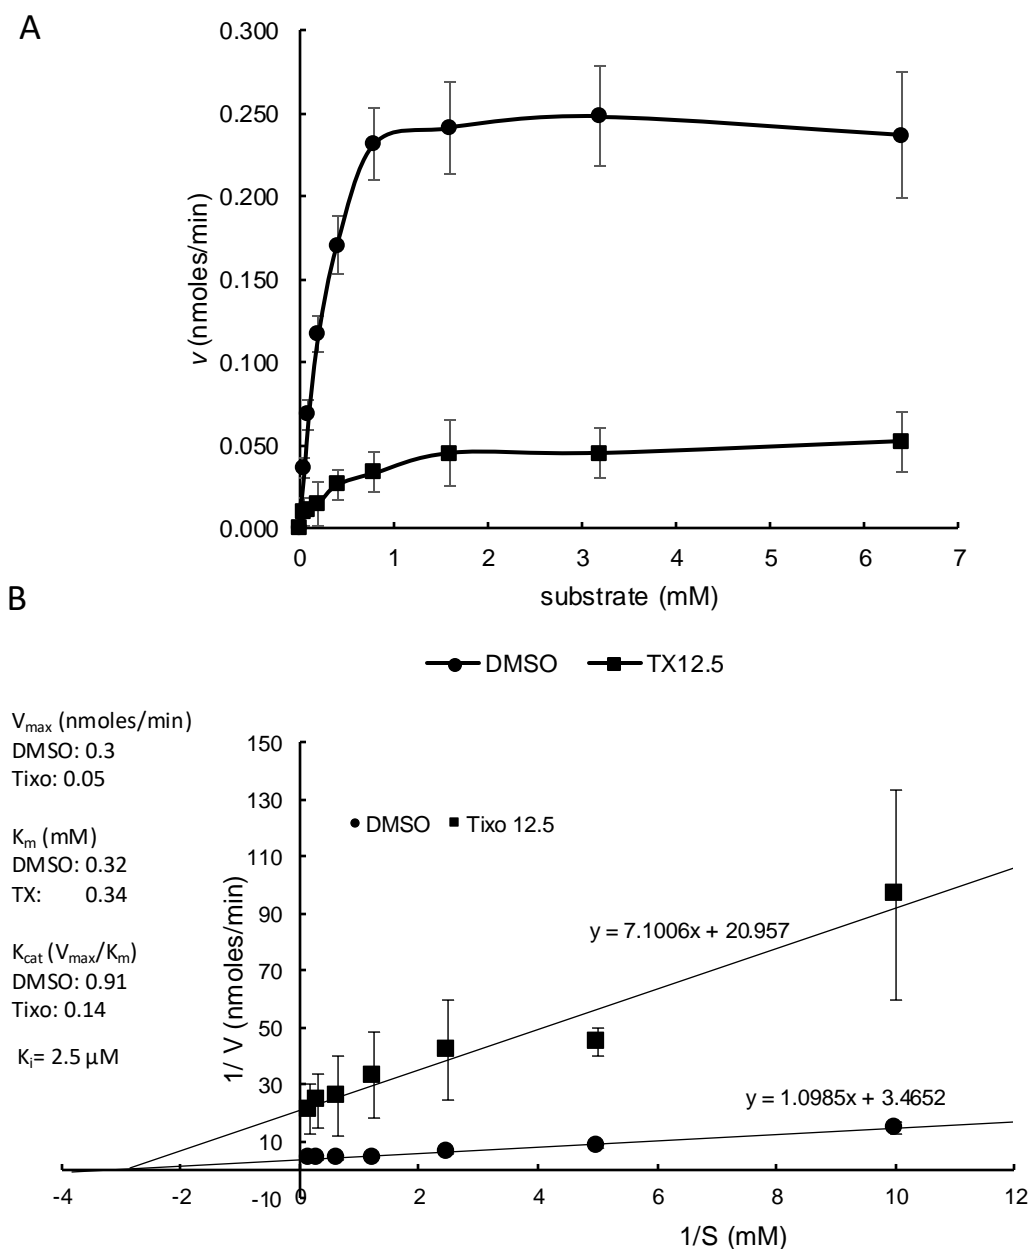

**Fig. S2: Michaelis Menten Kinetic analysis of WT SARS-CoV-2 M<sup>pro</sup> activity in the absence and presence of tixocortol.** Authentic WT M<sup>pro</sup> was preincubated in 50 mM HEPES buffer pH 7.8, 1 mM EDTA, 250 ug/ml BSA and 50 mM NaCl and treated with DMSO (5%) or tixocortol (12.5 $\mu\text{M}$  in final 5% DMSO). After 1 hr, peptide was added and the assay (50 nM M<sup>pro</sup>) carried out for 8 min in the linear region for this assay. The concentration of the peptide substrate was varied from 0.05 to 6.4 mM to determine the initial velocity for M<sup>pro</sup>. (A) The Michaelis Menten plot is substrate vs initial rate (v) in nanomoles of product per minute. Average and standard deviation was calculated from the data from three separate experiments (2 experimental values for the 0.8 mM substrate in DMSO treated) and are presented as the mean  $\pm$  standard deviation (SD). (B) Lineweaver-Burk plot for tixocortol-induced SARS-CoV-2 WT M<sup>pro</sup> inhibition, control (circles), 12.5  $\mu\text{M}$  tixocortol (squares). The error bars represent the standard deviation from three independent experiments. The data indicates non-competitive inhibition (similar  $K_m$  values with decreased  $V_{max}$ ). The error bars represent the standard deviation (note that only two data points plotted for 0.2 mM [S]). The data indicates non-competitive inhibition with a calculated apparent  $K_i$  of 2.5  $\mu\text{M}$  under these conditions.

Fig. S3

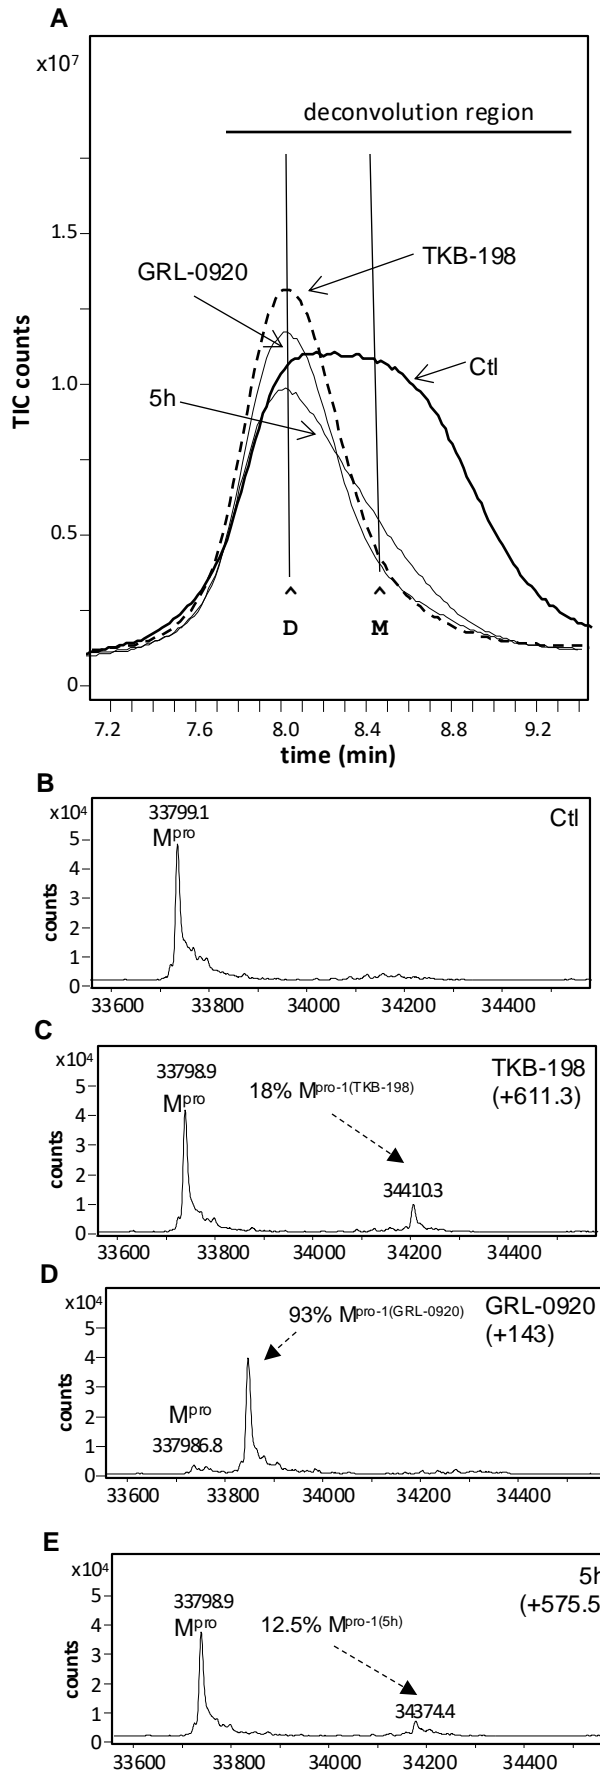

**Fig. S3: SEC analysis of the oligomeric state of  $M^{pro}$  and assessment of covalent modification by MS following treatment with GRL-0920, TKB-198, 5h.**  $M^{pro}$  (10  $\mu$ M) was incubated at 37 $^{\circ}$ C with DMSO control, TKB-198, GRL-0920 or 5h (200  $\mu$ M) (in 50 mM HEPES buffer pH 7.8 and 1 mM EDTA in a final of 15% DMSO for 1 hr and then analyzed by SEC-MS. (A) Elution profile for  $M^{pro}$  control and drug treated samples. Shown in the left panels (B, C, D, and E) is the determination of covalent modification of  $M^{pro}$  following protein deconvolution of the TIC for the eluting  $M^{pro}$  species for (B) control, (C) TKB-198, (D) GRL-0920 and (E) 5h. TIC for each condition.

Fig. S4

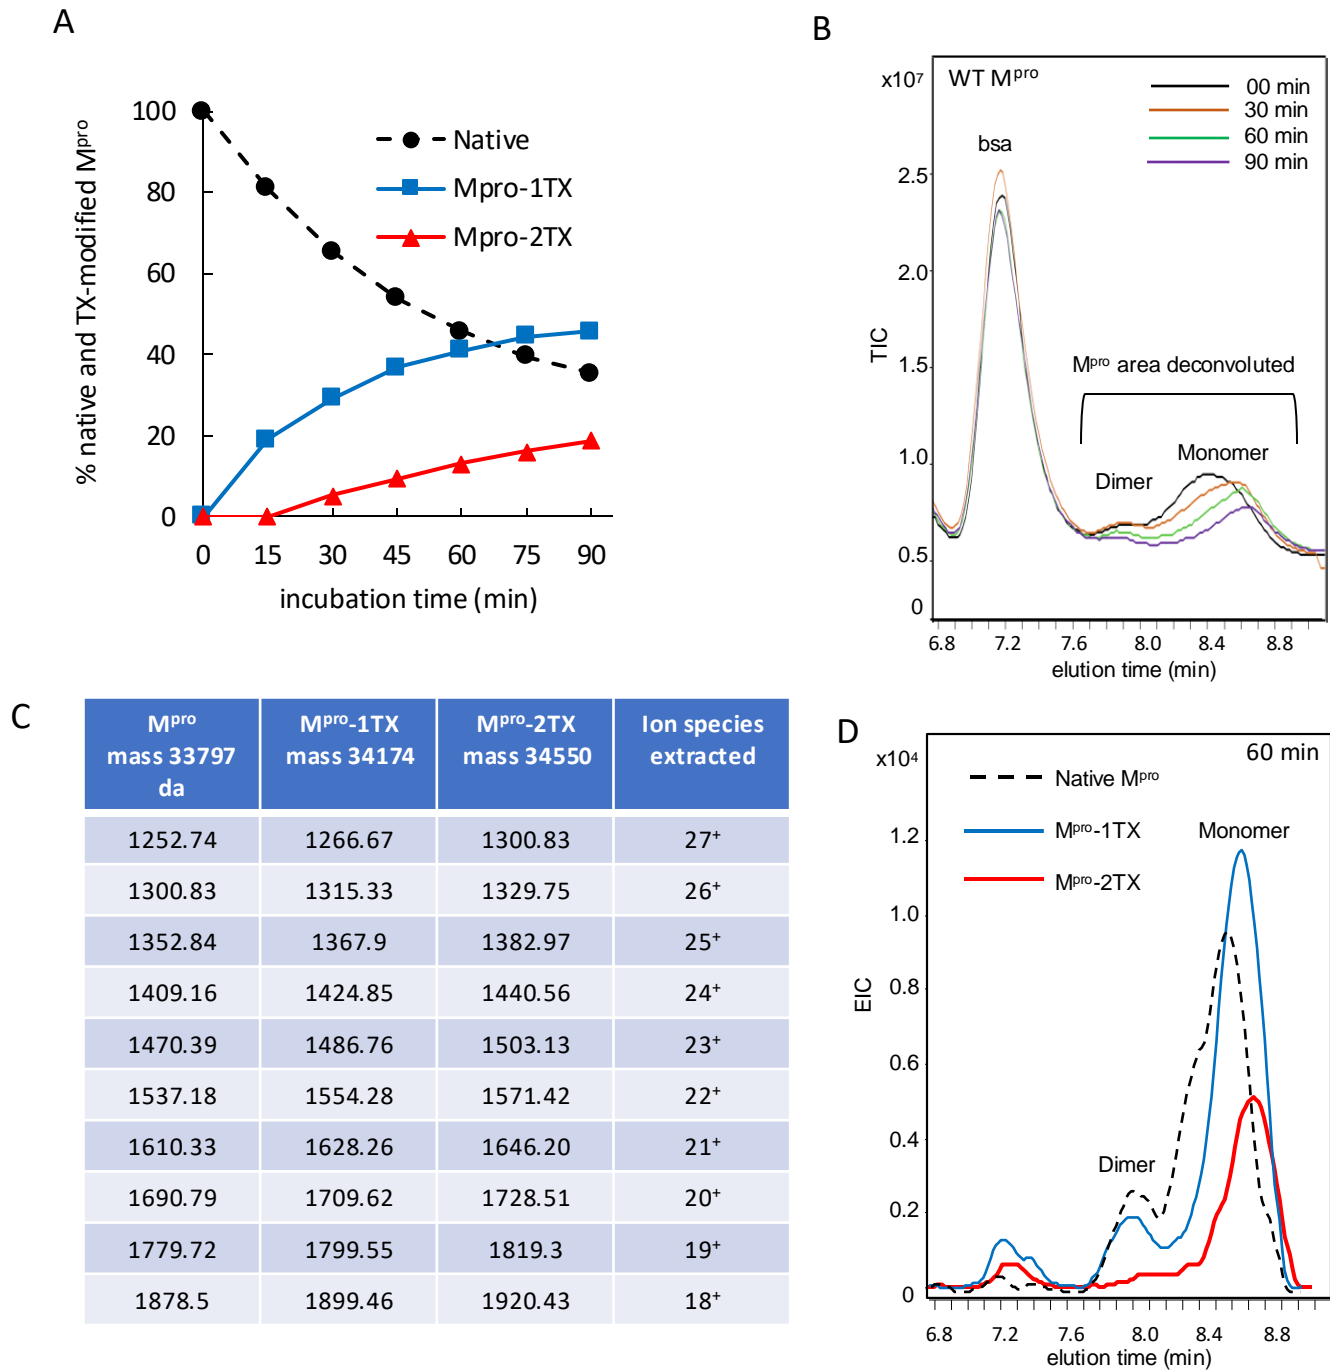

**Fig. S4: Covalent modification of SARS-CoV-2 WT M<sup>pro</sup> by tixocortol over a 90-minute period.** WT M<sup>pro</sup> at 1  $\mu$ M was incubated with 200  $\mu$ M TX in 50 mM HEPES buffer pH 7.8 with 50 mM NaCl and 1 mM EDTA and incubated at 37°C and then analyzed by SEC-MS. Carboxy methylated BSA (250  $\mu$ g/ml) was included as an internal control. (A) Percent of native and TX modified forms of M<sup>pro</sup> (M<sup>pro</sup>-1TX and M<sup>pro</sup>-2TX) obtained over time by protein deconvolution of the eluting M<sup>pro</sup> shown in (B) SEC/MS chromatography for eluting M<sup>pro</sup> treated with TX from 0- 90 min. (C) Molecular weights for native M<sup>pro</sup> and TX modified M<sup>pro</sup>'s and their associated prominent molecular ion species generated by mass spectrometry prior to deconvolution. (D) Elution profile obtained for each M<sup>pro</sup> species after 60 min of TX treatment. Each elution profile was obtained by using extracted ion current (from 6.8-9 min) for the ions specific to each M<sup>pro</sup> species. Native M<sup>pro</sup> (black hashed tracing), M<sup>pro</sup>-1TX (blue tracing) and M<sup>pro</sup>-2TX (red tracing). The ions associated with each species as seen in the table were extracted to reveal the elution profiles for the different M<sup>pro</sup> species following size exclusion chromatography as seen in Figure S4B.

Fig. S5

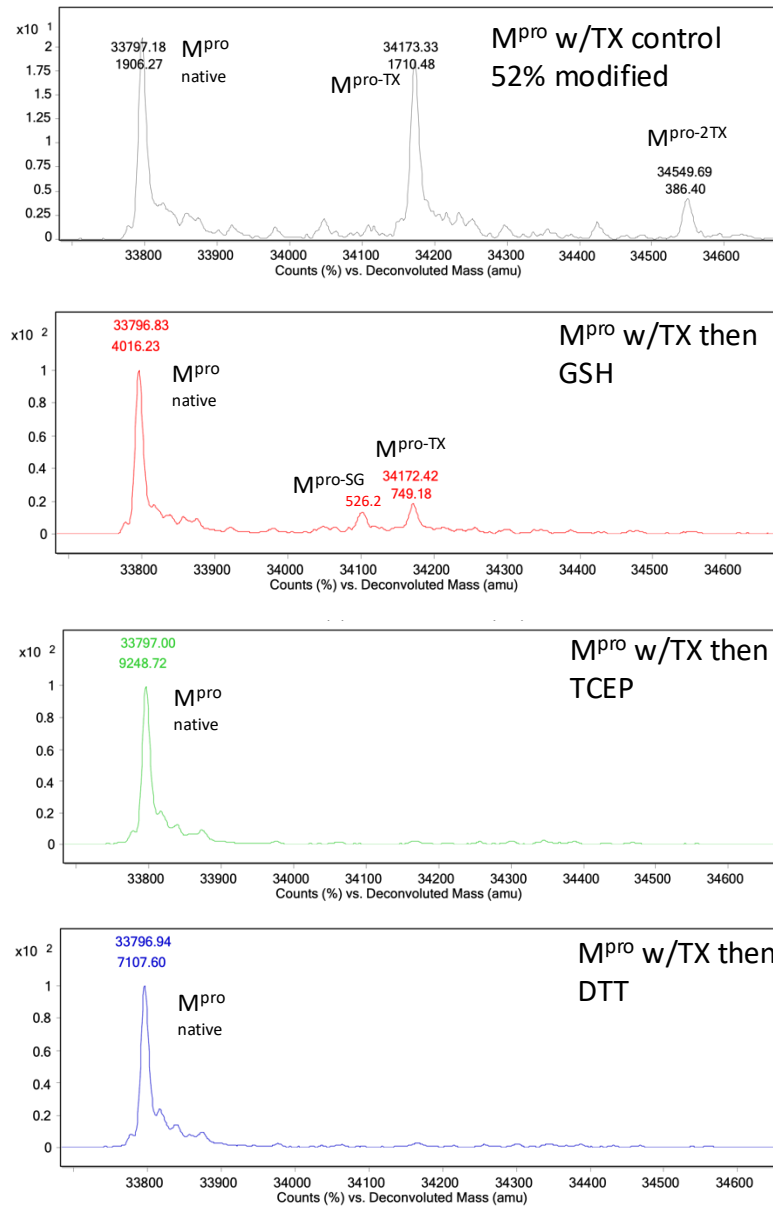

**Fig. S5:** Reversal of TX-modification of M<sup>pro</sup> with different reducing agents. M<sup>pro</sup> (1  $\mu$ M) was incubated with 50  $\mu$ M TX in assay buffer for 1 hr then reducing agents were added (diluted 1:20 as 20X stocks) to give a final concentration of 10 mM for 15 minutes. (water was used as a control) and samples then assayed by SEC/MS. Shown is the deconvolution for M<sup>pro</sup> for water control, GSH (20 mM), TCEP, or DTT 10 mM for 15 min.

Fig. S6

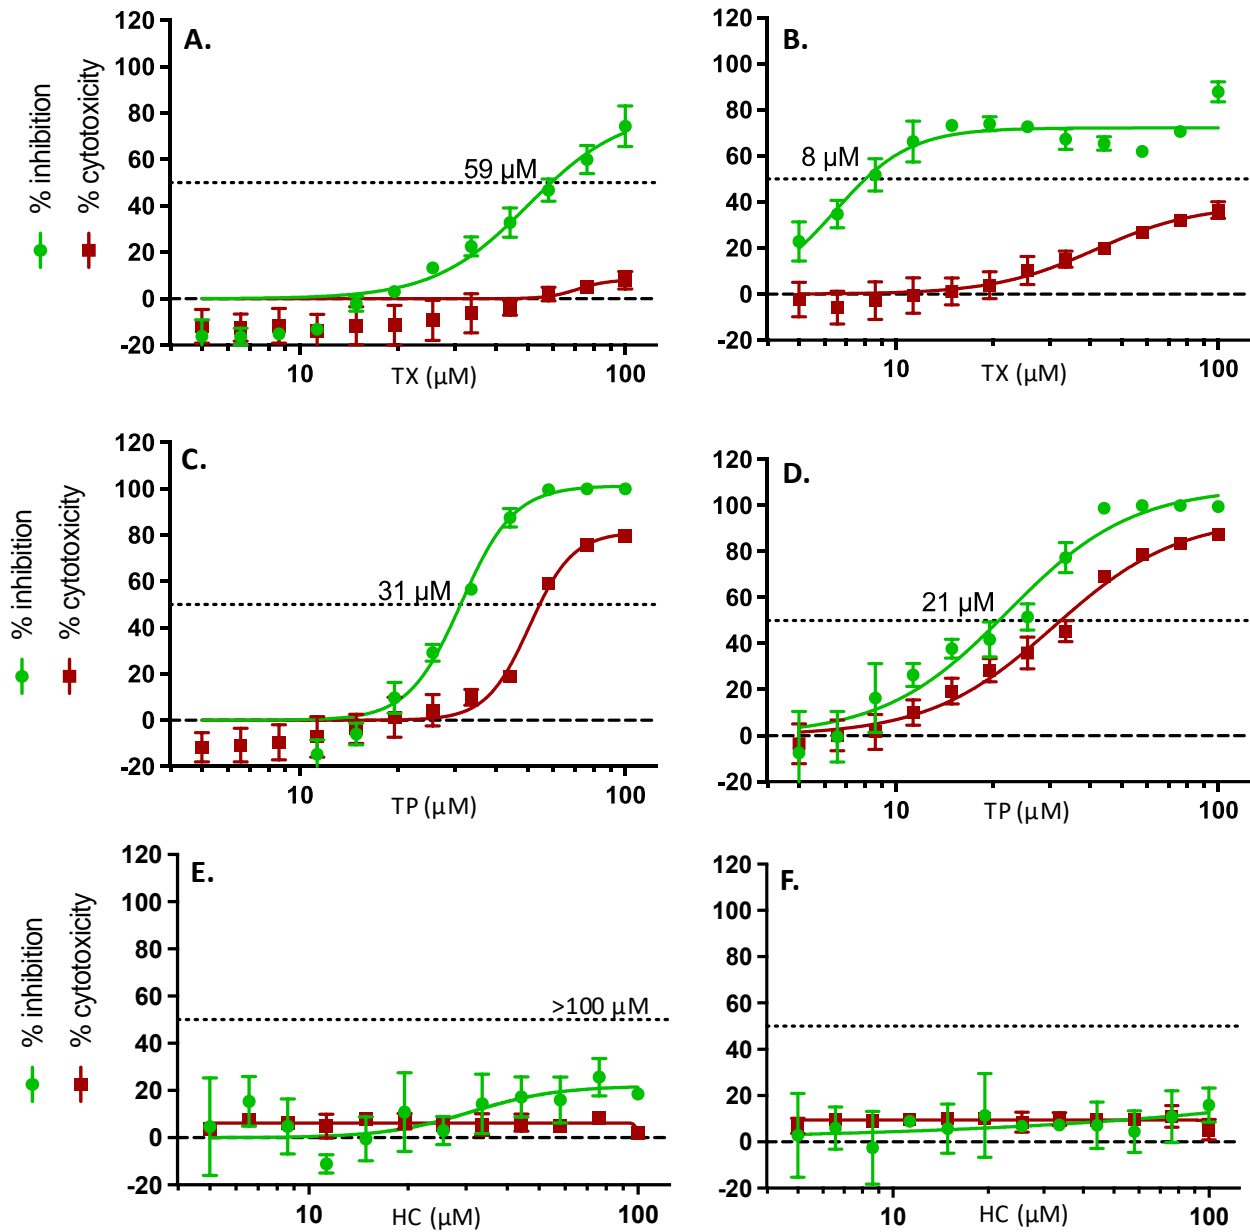

**Fig. S6: Inhibition of SARS-CoV-2 replication in HeLa -ACE2 cells following a 1-hr or 18-hr pretreatment with TX, TP or HC.** High-content imaging assays were performed to determine compound potency (green line), and CellTiter-Glo assays were performed to determine cell viability (red line). HeLa cells were grown in typical heat-inactivated serum. Cells were pretreated with drugs (TX, TP, or HC) for 1 hr (A, C and E) or 18 hr (B, D and F) prior to exposure to SARS-CoV-2. Results are reported as percentage inhibition of virus replication (green values) and cytotoxicity (red values) relative to untreated controls. Error bars represent standard deviations (SDs) from tests run for each concentration with 4 replicates.  $\text{IC}_{50}$ , half-maximal inhibitory concentration is indicated for each drug on the dotted line.



Fig. S7

A.

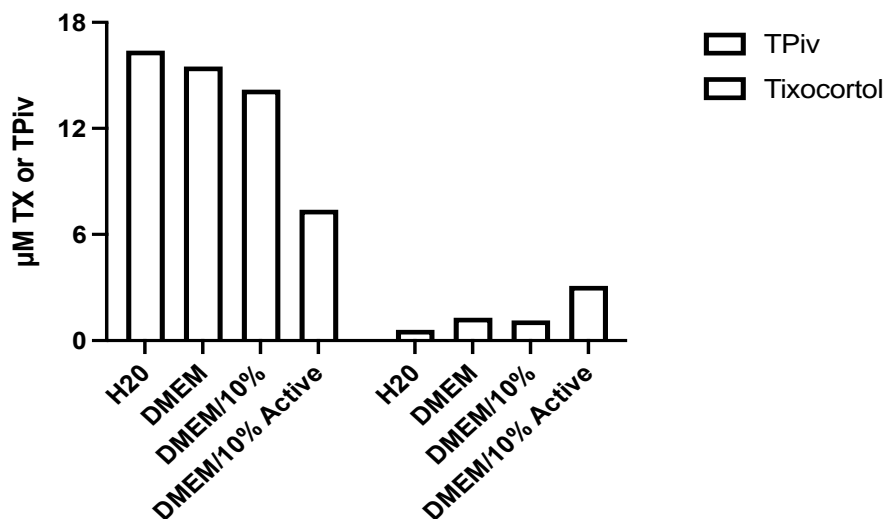

B.

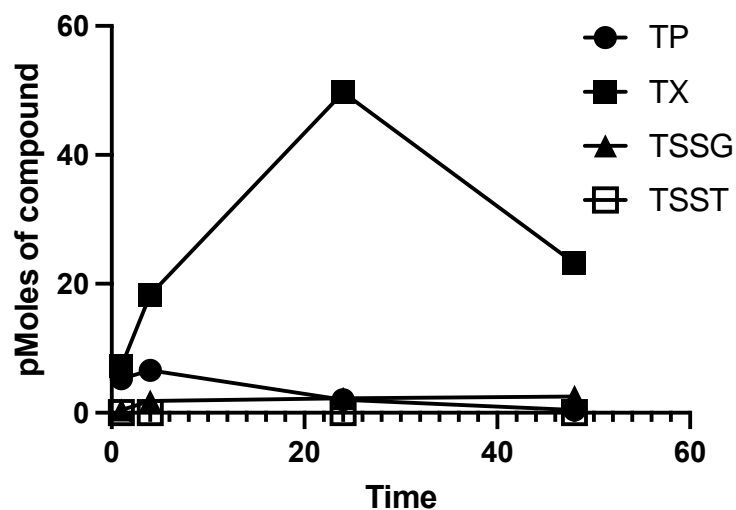

**Fig. S7: Metabolic fate of TP added to HeLa cells.** (A) TP (25  $\mu\text{M}$  final) was incubated in H<sub>2</sub>O, DMEM, DMEM with 10% heat inactivated serum, or DMEM with 10% serum not heat inactivated. Samples were left overnight (18 h) at 37°C. Samples were then diluted with DMSO (50% final), acidified with TFA (0.1%) and treated with TCEP (10 mM) to recover any disulfide bound TX released from TP. The amount of TP and TX recovered from the samples was determined based on TP and TX standards. (B) HeLa cells were plated overnight and then cells were treated with TP (50  $\mu\text{M}$ ). Cells were then extracted for metabolites after 1, 4, 24, and 48 hr incubation. Cells were washed with PBS the cells were then trypsinized followed by three washes with PBS. The pellet was then extracted with 60% methanol solution/0.2% TFA and heated at 95 degrees for 5 minutes. Cellular debris was removed by centrifugation and the methanolic/TFA solution dried by speed vac to dryness. The residue was dissolved in 100% DMSO and analyzed by RP-HPLC/MS. Shown are the levels of TP, TX, TSSG and the disulfide of TX.

**Fig. S8**

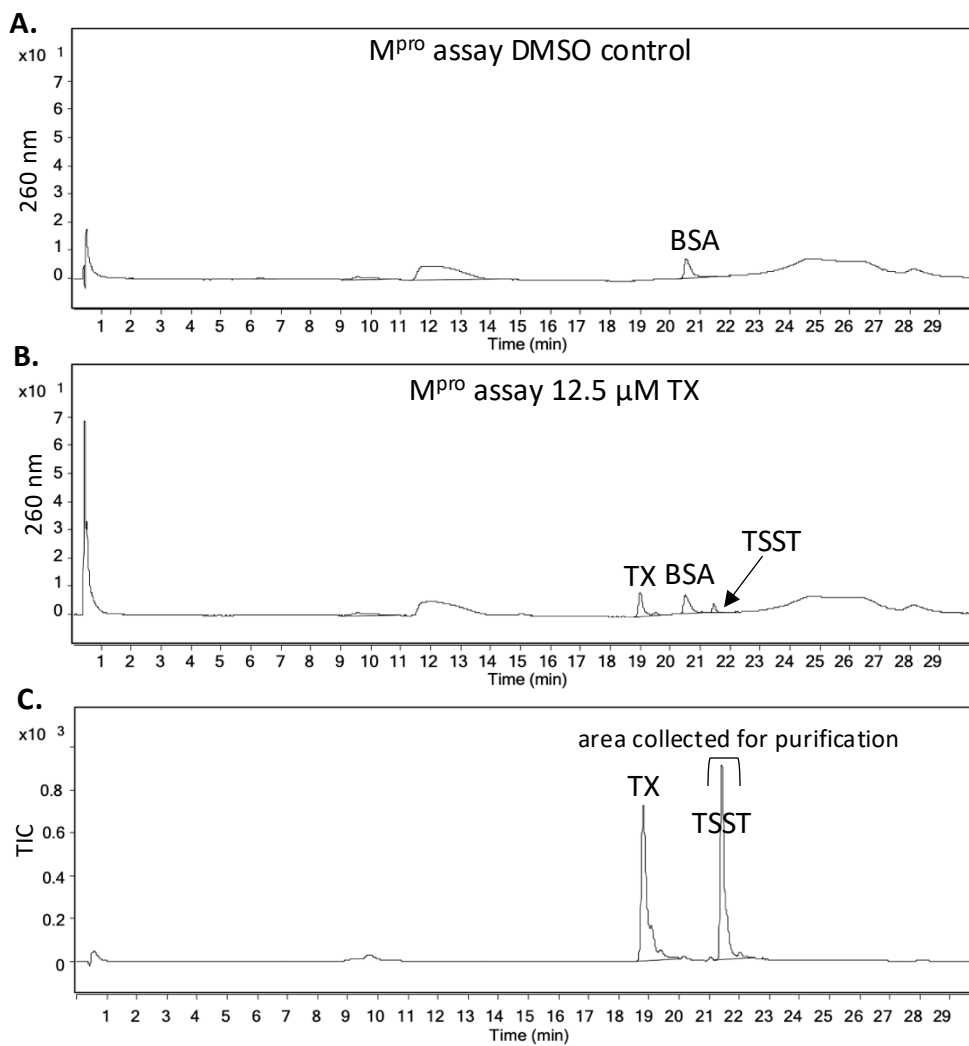

**Fig. S8: Identification of the production of TSST in M<sup>pro</sup> assays with TX and purification of TSST.** The peptide assay was done as described for MM kinetics. A) DMSO treated control M<sup>pro</sup> (50 nM) with 1.6 mM substrate analyzed at 260 nm to detect the steroid ring. B) TX treated (12.5  $\mu$ M) M<sup>pro</sup> (50 nM) with 1.6 mM substrate. Shown above UV tracing at 260 nm that reveals TX, TSST due the typical absorption for  $\alpha$ ,  $\beta$ -unsaturated ketones and BSA and . C) TX and TSST were identified by mass spectrometric analysis following the RP-HPLC C18 chromatography shown is the TIC chromatogram. For purification of TSST, TX (1 mM) was incubated overnight in HEPES buffer pH 7.8 and 10% DMSO. A precipitate formed which contained the majority of TX and TSST. This was redissolved in 100% DMSO and then run on RP-HPLC (assay method) to separate TX from TSST. The area for the eluting TSST was collected as shown above using the assay RP-HPLC method.

**Fig. S9**

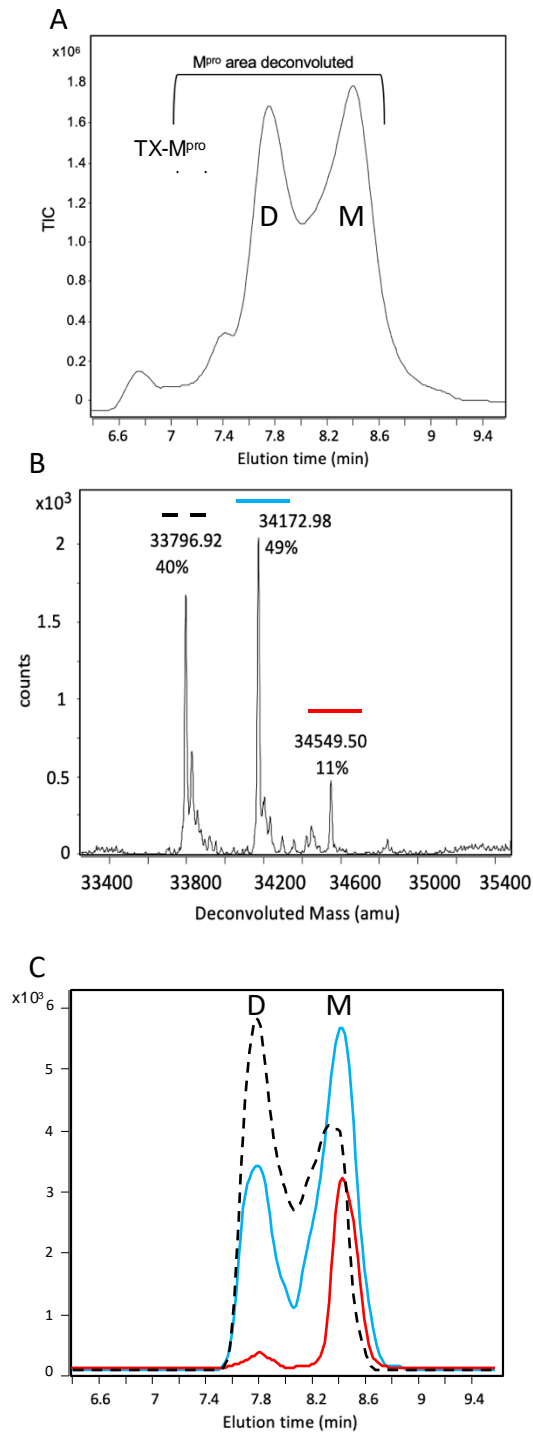

**Fig. S9: SEC analysis of the oligomeric state of TX-M<sup>pro</sup> and assessment of covalent modification by MS protein deconvolution.** TX-M<sup>pro</sup> was prepared as described in materials and methods and then analyzed by SEC/MS. (A) SEC behavior of TX-M<sup>pro</sup> revealing both dimer and monomer peaks for M<sup>pro</sup> as indicated. (B) Protein deconvolution of TX-M<sup>pro</sup> showing percent native and TX-modified forms of M<sup>pro</sup>. (C) Elution profile obtained for each M<sup>pro</sup> species in the TX-M<sup>pro</sup> preparation using extracted ion current (from 6.5-9.5 min) for the ions specific to each M<sup>pro</sup> species (see supplemental file 2 for extracted ions). Native M<sup>pro</sup> (black hashed tracing), TX1-M<sup>pro</sup> (blue tracing) and 2TX-M<sup>pro</sup> (red tracing).

Fig. S10

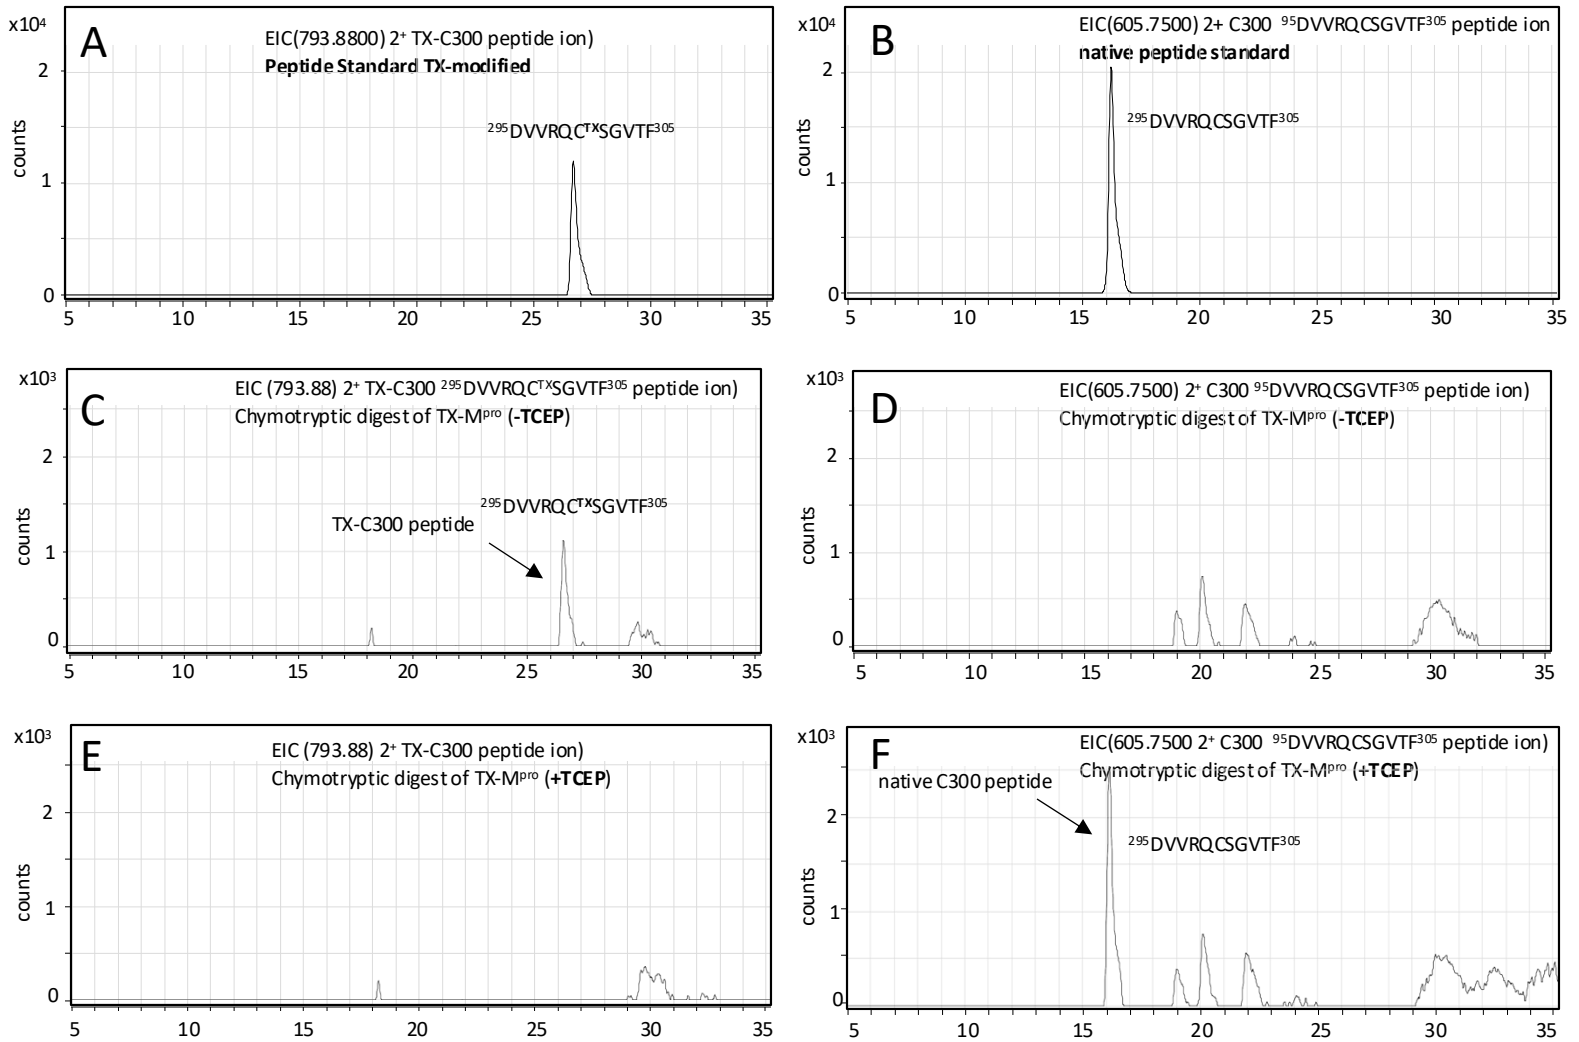

**Fig. S10: Identification of TX modification of Cys300 in chymotryptic digests of the TX-M<sup>pro</sup> preparation.** The TX-M<sup>pro</sup> preparation was alkylated and digested with chymotrypsin as described in the materials and methods and then analyzed by RP-HPLC/MALDI-TOF for the identification of M<sup>pro</sup> chymotryptic peptides. (A,B) Elution profile for (A) the TX-Cys300  $^{295}\text{DVVRQC}^{\text{TX}}\text{SGVTF}^{305}$  peptide standard or (B) the corresponding  $^{295}\text{DVVRQCSGVTF}^{305}$  native peptide standard. (C,D) Identification of (C) TX-modified Cys300 peptide in the chymotryptic digests of TX-M<sup>pro</sup> and (D) absence of detection of the native Cys300 peptide prior to TCEP treatment. (E,F) Loss of detection of (E) detection (F) of the native Cys300 peptide following TCEP treatment of the peptide digest. peaks were identified by ion extraction of the 2+ forms of the Cys300 peptide as indicated.

**Fig. S11**

| Cys Number | Peptide Sequence/mass      | Calculated monoisotopic mass after alkylation | Peptide ions observed                     | RT (min) | % TX modified Peptide estimated |
|------------|----------------------------|-----------------------------------------------|-------------------------------------------|----------|---------------------------------|
| 16         | PSGKVEGCM (906.4)          | 1031.4                                        | 516.7 <sup>2+</sup>                       | 20.1     | 0                               |
| 22         | VQVTCGTTL (920.5)          | 1045.5                                        | 523.7 <sup>2+</sup>                       | 13.7     | 0                               |
| 38,44      | CPRHVICTSEDMLNPNY (1990.9) | 2240.9                                        | NF                                        | -        | -                               |
| 85         | RVIGHSMQNCVL (1355.7)      | 1480.7                                        | 741.3 <sup>2+</sup>                       | 20.2     | 0                               |
| 117        | SVLACY (654.3)             | 779.3                                         | 780.4 <sup>1+</sup>                       | 17.0     | 0                               |
| 128        | QCAMRPNF (965.4)           | 1090.5                                        | 546.3 <sup>2+</sup> ,1091.5 <sup>1+</sup> | 19.8     | 0                               |
| 128*       | pyQCAMRPNF (948.4)         | 1073.5                                        | 537.8 <sup>2+</sup>                       | 20.6     | 0                               |
| 145        | LNGSCGSVGF (939.4)         | 1064.4                                        | 533.2 <sup>2+</sup> ,1065.4 <sup>1+</sup> | 15.0     | 0                               |
| 145**      | TIKGSFLNGSCGSVGF (1572.8)  | 1697.8                                        | 849.9 <sup>2+</sup>                       | 16.9     | 0                               |
| 156        | DCVSF (569.2)              | 694.2                                         | 695.2 <sup>1+</sup>                       | 9.7      | 0                               |
| 156***     | NIDYDCVSF (1209.6)         | 1199.4                                        | 600.7 <sup>1+</sup>                       | 22.0     | 0                               |
| 160        | CY (284.1)                 | 409.08                                        | NF                                        | -        | -                               |
| 265        | DMCASLKEL (1008.5)         | 1133.5                                        | 567.8 <sup>2+</sup>                       | 19.7     | 0                               |
| 300        | DVVRQC SGVTF (1209.6)      | 1334.6                                        | 668.3 <sup>2+</sup>                       | 19.0     | 25                              |
| 300****    | DVVRQC SGVTFQ (1337.6)     | 1462.6                                        | 732.3 <sup>2+</sup>                       | 17.4     | 37                              |

**Fig. S11: Cysteine containing peptides identified after chymotrypsin digestion.** Shown is the amino acid sequence for each Cys containing peptide, the monoisotopic mass for the native and alkylated forms and the peptide ions observed for each peptide. \* This peptide containing cysteine 128 occurs (about 50% is this form) due to spontaneous deamidation which is known to occur with N-terminal glutamine residues. \*\* This peptide containing Cys145 results from incomplete cleavage at the 140:141 predicated chymotryptic cleavage site. \*\*\*This peptide containing cysteine 156 results from incomplete cleavage at the 154:155 predicted chymotryptic cleavage site. \*\*\*\*This peptide containing Cys300 occurs as a result of incomplete cleavage at the 305:306 predicted chymotryptic cleavage site. NF=Not found.

Fig. S12

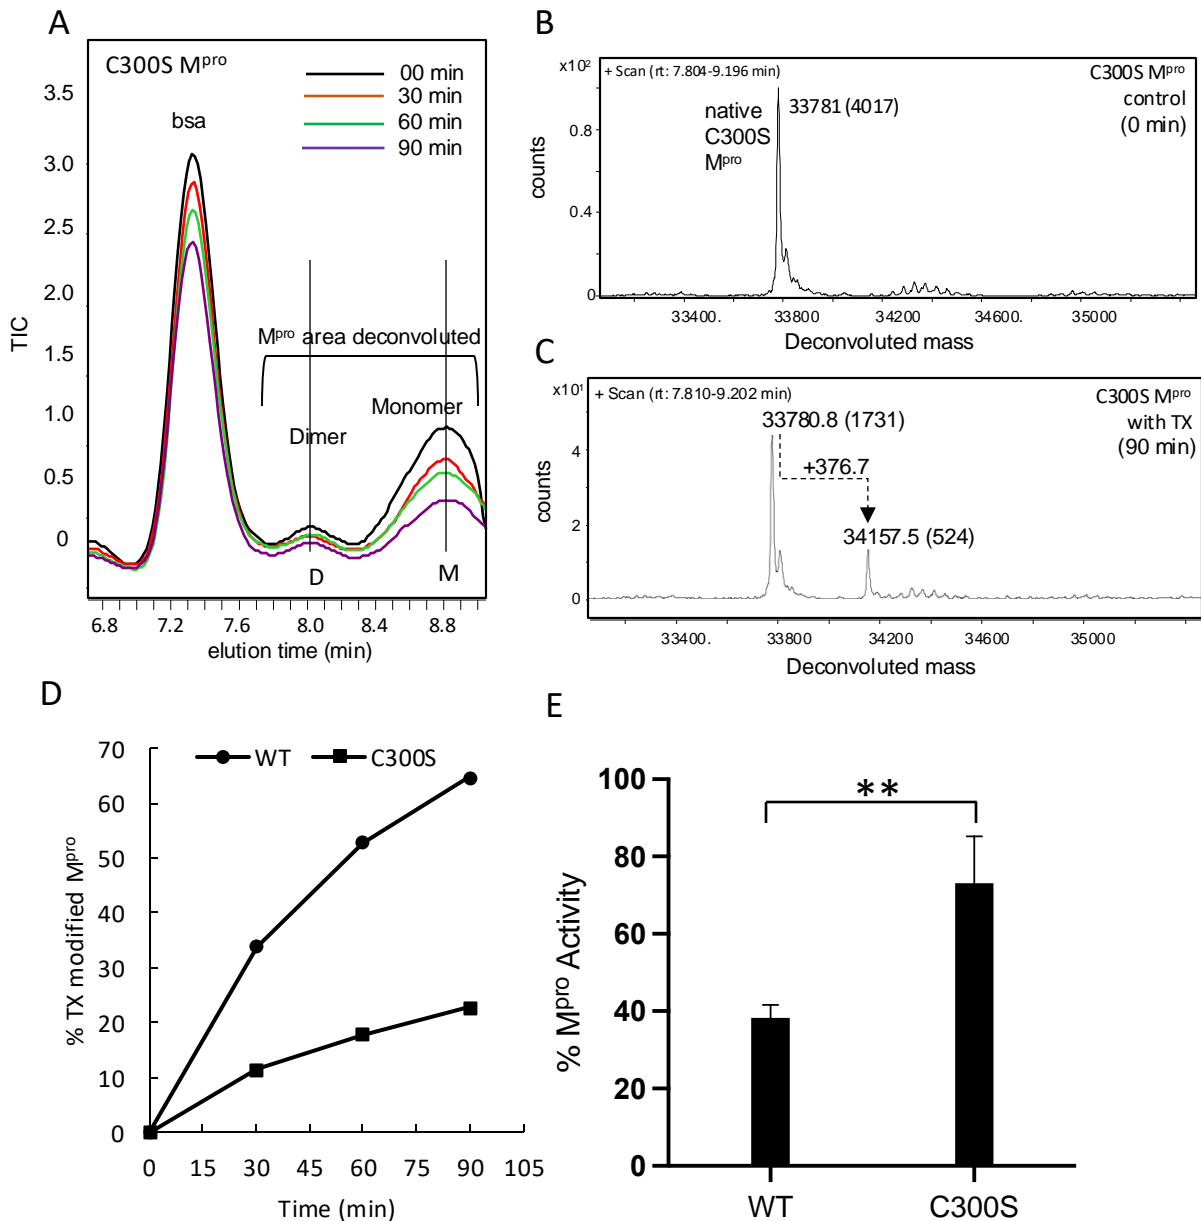

**Fig. S12: SEC/MS analysis of the oligomeric state and covalent modification of SARS-CoV-2 C300S M<sup>pro</sup> treated with TX over a 90 minute period.** (A) Elution profile for C300S M<sup>pro</sup> treated with TX (200:1 ratio) at 0, 30, 60 and 90 minutes after TX treatment. C300S M<sup>pro</sup> at 1  $\mu$ M was incubated with 200  $\mu$ M TX in 50 mM HEPES buffer pH 7.8 with 50 mM NaCl and 1 mM EDTA and incubated at 35<sup>o</sup>C and then analyzed by SEC-MS. BSA (250  $\mu$ g/ml) was included as an internal control. Total ion current was used to detect the eluting protein. (B,C) Protein deconvolution of C300S M<sup>pro</sup> eluting between 7.8 and 9.2 min at (B) time 0 and (C) 90 minutes after incubation with TX (200:1) showing the masses observed consistent with a single TX modification of C300S M<sup>pro</sup>. (D) Shown is the percent TX modified M<sup>pro</sup> for WT M<sup>pro</sup>(circles) and C300S M<sup>pro</sup> (squares) at different time points after TX treatment. (E) M<sup>pro</sup> activity was measured using the peptide based HPLC assay with 50 nM of each M<sup>pro</sup> and 12.5  $\mu$ M of TX. M<sup>pro</sup>'s were incubated for 1-hr then assayed for 10 minutes. Products were determined by measuring their absorbance at 205nm. WT and C300S values represents 3 independent experiments, error bars are +/- SD, students T-test \*P<0.01.

Fig. S13

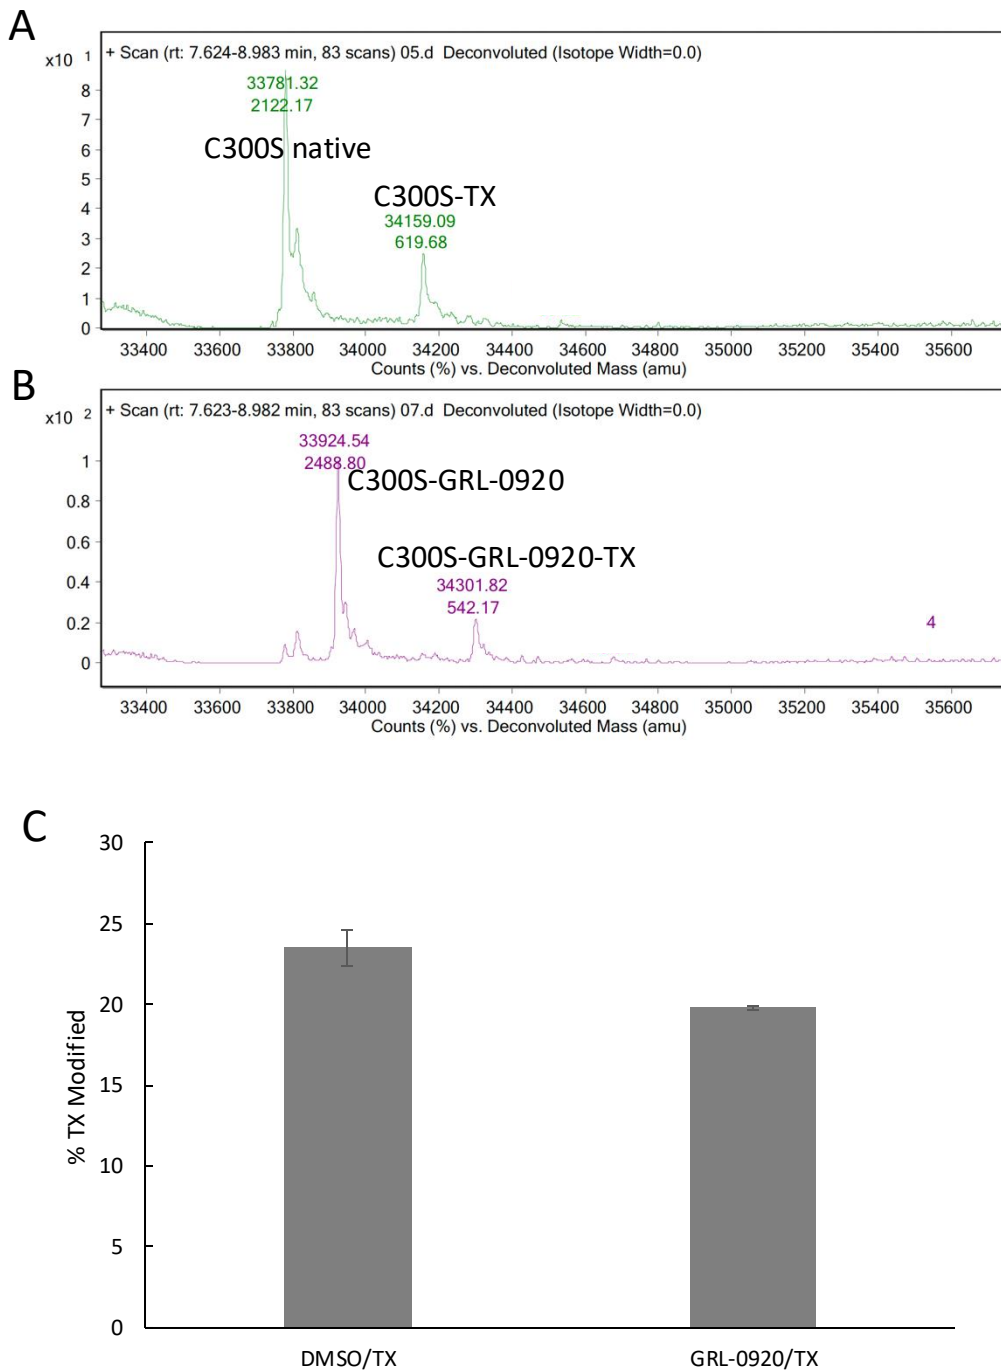

**Fig. S13: Assessment of TX covalent modification of C300S without or with GRL-0920 pretreatment to covalently occupy the active site cysteine.** Deconvolution following SEC analysis of (A) C300S M<sup>pro</sup> treated with TX (200:1) for 30 min or (B) C300S M<sup>pro</sup> pretreated with GRL-0920. The masses for the TX modified and GRL-0920 modified proteases are indicated. (C) Quantification of TX modified C300S M<sup>pro</sup> without or with pretreatment with GRL-0920 to occupy Cys145. The results are an average of 3 experiments with one example shown in A and B.

Fig. S14

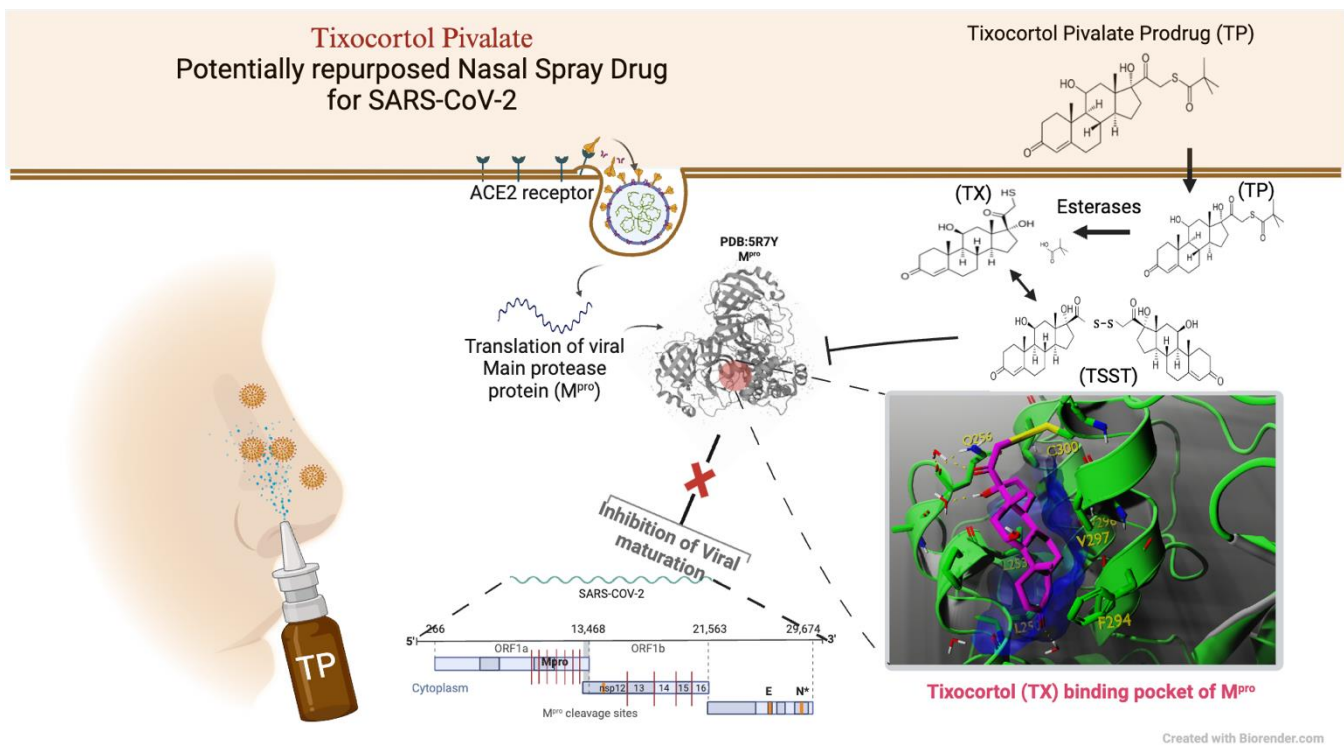

**Fig. S14:** Proposed schematic depicting the action of tixocortol pivalate against  $M^{pro}$  and SARS-CoV-2 replication. TP undergoes conversion to TX by serum and cellular esterases. In cells, TX may undergo further conversion to TSST, however both TX and TSST can covalently modify and inhibit  $M^{pro}$  activity thereby preventing the replication of SARS-CoV-2.



1 † *Electronic Supplementary Information*

2

3

4 **Discovery of a Nasal Spray Steroid, Tixocortol, as an Inhibitor SARS-**  
5 **CoV-2 Main Protease and Viral Replication**

6 David A. Davis<sup>a</sup>, Ashwin Nair<sup>a</sup>, Yana Astter<sup>a</sup>, Emma Treco<sup>a</sup>, Brian D. Peyser<sup>b</sup>, Rick Gussio<sup>E</sup>, Tam  
7 Luong Nguyen<sup>b</sup>, Haydar Bulut<sup>a</sup>, Brett Eaton<sup>c</sup>, Michael Murphy<sup>c</sup>, Prabha Shrestha<sup>a</sup>, Shin-Ichiro  
8 Hattorri<sup>d</sup>, Hiroaki Mitsuya<sup>a,d</sup> and Robert Yarchoan<sup>a</sup>

9

10 *a. HIV and AIDS Malignancy Branch, Center for Cancer Research, National Cancer Institute,*

11 *Bethesda MD*

12 *b. Developmental Therapeutics Program, Division of Cancer Treatment and Diagnosis,*

13 *National Cancer Institute, National Institutes of Health*

14 *c. Integrated Research Facility at Fort Detrick, 8200 Research Plaza, Frederick, MD 21702*

15 *d. National Center for Global Health and Medicine Research Institute, Department of*

16 *Refractory Viral Infections, 1-21-1 Toyama Shinjuku-ku, Tokyo 162-8655, Japan*

17 *e. Vaccine Branch, Center for Cancer Research, National Cancer Institute, Frederick National*

18 *Laboratory for Cancer Research, Frederick, MD 21702*

19

20

21

## 22 **Molecular docking of glutathione and compound discovery procedure:**

23 The objective was to form an all-atom detailed molecular model around L-glutathione. Among the SARS-  
24 CoV-2 main protease structures examined from the Protein Data Bank, there are marked similarities in  
25 their secondary and tertiary features. For the preliminary model, we chose the M<sup>pro</sup> X-ray structure  
26 PDB:7AXM (1), the monomeric main protease that has been co-crystalized with Pelitinib. In this initial  
27 phase, the preliminary model served as a basis for ligand discovery.

### 28 **Creation of the Preliminary Model**

29 Structural alignments and structural sequence comparisons were performed with the Schrödinger  
30 Maestro V12.0.012, or Biovia's Discovery Studio V18.1. Protein preparation (potential assignment,  
31 preliminary optimization) was performed with both versions as well. Discovery Studio was employed to  
32 transfer potentials into compatible radii into the Biosym Discovery package. With respect to the  
33 development of a Main protease/ L-Glutathione\_2S\_2R model, we compared the ability of L-glutathione  
34 and D-glutathione to interact with a modelled subsite adjacent to the C300 of the main protease of SARS-  
35 CoV-2. Pelitinib was removed from the model. Detailed molecular docking studies were conducted to  
36 explore conformational space near a loop at the top of the helix containing C300. The objectives and  
37 requirements were:

- 38
- 39 1) Create a preliminary model where protein/atom-ligand/atom contacts show biochemical  
40 feasibility and chemical complementarity between glutathione and the protein binding site. The  
41 side chains of hydrophobic protein residues will form hydrophobic favorable interactions  
42 (hydrophobic-hydrophobic, hydrogen bonding, acid-base) with complementary atoms of  
43 glutathione. More importantly, polar residues and backbone atoms of the protein are not allowed  
44 to form unfavorable hydrophobic contacts (hydrophobic-polar, acid-acid, base-base) with the

45 main protease. When needed, hydrophatics could be evaluated using the HINT software (4), or  
46 when small molecule parameters are missing, atom types and distances can be found in other  
47 high resolution X-ray structures as a model for the hydrophatic non-bonded interactions.

48 2) Since the putative binding site is shallow, both glutathione enantiomers must be partially buried  
49 from the solvent-protein interface (Stern layer). Since L-Glutathione has confirmed activity, it will  
50 serve as a template for the binding model of D-Glutathione, since both have isomeric structures.

51 The starting conformation for docking is assumed to initiate from the oxidation of L-Glutathione  
52 S-H and the C300 S-H.

53 3) Sterically, van der Waals violations can be no greater than 0.5 angstroms (bump violations). This  
54 would enable molecular mechanics optimizations (energy refinement) to proceed directly.  
55 Importantly, these docking objectives were performed with all-atom models (fully hydrogenated).  
56 An all-atom model would be equivalent to an X-ray structure having a resolution of 0.5 angstroms  
57 (0.6 angstrom resolution is the limit for X-ray diffraction).

58 4) Both carboxylate residues of glutathione must be balanced electrostatically (neutral charge) with  
59 complementary cationic side chains (e.g., Lys or Arg), or counterions (e.g., Na<sup>+</sup> or K<sup>+</sup>). In the main  
60 protease sequences, Lys and Arg are often interchangeable.

61 5) Wherever possible, hydrogen bonds will be formed either directly between the appropriate ligand  
62 polar atoms and protein side chains or backbone atoms, or indirectly via water bridges.

63 6) The anchor for the interaction is the C300 side chain which must maintain a disulfide bond with  
64 the L-glutathione S-H.

65 7) The overall objective is to create an accurate model that can be used for ligand discovery or ligand  
66 design. As more data becomes available, and these data conflict with the structure activity  
67 relationship (SAR) inherent to protein/ligand contacts, the models will be improved or rebuilt.

68            Thus, detailed models are considered only a work-in-progress, until 100% of the structure activity  
69            relationships are explained.

70  
71            Using the disulfide bond as the starting point for the docking, all rotatable bonds (10 for each  
72            glutathione) were systematically explored until the preliminary modeling objectives (see above) were  
73            achieved. Amide bonds were explored in their trans conformations, unless trans conformational isomers  
74            prohibited biochemical feasibility during the evolution of the model. This was never the case in this study.  
75            During molecular docking, if steric clashes were observed, the surrounding loop residues of protein were  
76            moved so that space would allow the glutathione to partially bury the compound out of the first hydration  
77            layer. In an iterative manner, both protein and ligands were checked for intramolecular bump and  
78            hydrophobic violations and remodeled until these were eliminated. The preliminary model was developed  
79            using the Biovia Insight II (2005) molecular modeling suite with full SGI dialbox capability. Ligand  
80            construction and conformational exploration (molecular mechanics dynamics and optimizations) was  
81            performed using the ChemOffice 3D package utilizing MM2 and MM4 force field parameters.

82

### 83    **Preliminary Model Energetic Refinement**

84            Molecular mechanics simulations consisted of combining steepest descents with conjugate gradient  
85            optimizations (Fletcher Powel optimization) utilizing the cff91 class II force field from the Discover  
86            molecular mechanics package. First the sterically and hydrophobically feasible model was built according  
87            to the criteria above. Next, the ligand was fixed to enable residues of the main protease to adjust their  
88            side chain disposition about the ligand conformation that was developed during preliminary modeling  
89            phase. Once hydrogen atoms were optimized, the backbone atoms remained fixed so that the side chains  
90            were allowed to optimize first. If the model lacked bump violations (< 0.25 angstrom Van Der Waal  
91            overlap) the entire residues between Ser A1 to Phe A8 were then allowed to relax, while the backbone

92 remained tethered using constraints up to 100 Kcal/angstrom<sup>2</sup>. Optimization proceeded until the norm of  
93 the gradient was less than 0.5 Kcal/angstrom. At all times, a harmonic constraint between the L-  
94 glutathione S and the  $\gamma$ -S of the C300 residue was enforced with 20 Kcal/angstrom force at the lower  
95 boundary, and a 100 Kcal/angstrom at the upper limit. We found it necessary to add an additional  
96 constraint between the  $\alpha$ -C of the Val A296 residue and the O4 of the ligand to prevent the formation of  
97 a hydrophobic unfavorable interaction during minimization. In this case, a lower limit of 3.65 Å was  
98 enforced between any polar atom/hydrophobic pair with Val A296 and O4 of L-glutathione (the  
99 hydrophobic minimum distance for carbon polar atom contacts). A 4.0 Å upper limit was employed for this  
100 constraint as well. This cycle was repeated while the necessary adjustments were made to the model  
101 based on the objectives stated above. An optimized model satisfying all objectives was obtained after 9  
102 iterations of this procedure. During all molecular mechanics simulations, a distance-dependent dielectric  
103 was employed to attenuate the electrostatic terms for H-bond and salt bridge non-bonded interactions.  
104 In the final model, the obtained non-bonded interactions were congruent with non-bonded interactions  
105 frequently observed in high resolution X-ray structures. We have used this general method successfully,  
106 with variations depending on the requirements of the protein/ligand interactions (2,3). A detailed  
107 description of quantitative hydrophobic interactions can be found in (4).

## 108 References

109 1 Günther S, Reinke PYA, Fernández-García Y, Lieske J, Lane TJ, Ginn HM, Koua FHM, Ehrt C, Ewert W,  
110 Oberthuer D, Yefanov O, Meier S, Lorenzen K, Krichel B, Kopicki JD, Gelisio L, Brehm W, Dunkel I, Seychell  
111 B, Gieseler H, Norton-Baker B, Escudero-Pérez B, Domaracky M, Saouane S, Tolstikova A, White TA, Hänle  
112 A, Groessler M, Fleckenstein H, Trost F, Galchenkova M, Gevorgov Y, Li C, Awel S, Peck A, Barthelmess M,  
113 Schlünzen F, Lourdu Xavier P, Werner N, Andaleeb H, Ullah N, Falke S, Srinivasan V, França BA, Schwitzer  
114 M, Brognaro H, Rogers C, Melo D, Zaitseva-Doyle JJ, Knoska J, Peña-Murillo GE, Mashhour AR, Hennicke  
115 V, Fischer P, Hakanpää J, Meyer J, Gribbon P, Ellinger B, Kuzikov M, Wolf M, Beccari AR, Bourenkov G, von

116 Stetten D, Pompidor G, Bento I, Panneerselvam S, Karpics I, Schneider TR, Garcia-Alai MM, Niebling S,  
117 Günther C, Schmidt C, Schubert R, Han H, Boger J, Monteiro DCF, Zhang L, Sun X, Pletzer-Zelgert J,  
118 Wollenhaupt J, Feiler CG, Weiss MS, Schulz EC, Mehrabi P, Karničar K, Usenik A, Loboda J, Tidow H, Chari  
119 A, Hilgenfeld R, Uetrecht C, Cox R, Zaliani A, Beck T, Rarey M, Günther S, Turk D, Hinrichs W, Chapman HN,  
120 Pearson AR, Betzel C, Meents A. X-ray screening identifies active site and allosteric inhibitors of SARS-CoV-  
121 2 main protease. *Science*. 2021 May 7;372(6542):642-646. Epub 2021 Apr 2. PMID: 33811162; PMCID:  
122 PMC8224385.

123 2 Diaz P, Horne E, Xu C, Hamel E, Wagenbach M, Petrov RR, Uhlenbruck B, Haas B, Hothi P, Wordeman L,  
124 Gussio R, Stella N. Modified carbazoles destabilize microtubules and kill glioblastoma multiform cells. *Eur*  
125 *J Med Chem*. 2018 Nov 5;159:74-89, PMID: 30268825; PMCID: PMC6690746.

126 3 Burnett JC, Lim C, Peyser BD, Samankumara LP, Kovaliov M, Colombo R, Bulfer SL, LaPorte MG, Hermone  
127 AR, McGrath CF, Arkin MR, Gussio R, Huryh DM, Wipf P. A threonine turnstile defines a dynamic  
128 amphiphilic binding motif in the AAA ATPase p97 allosteric binding site. *Org Biomol Chem*. 2017 May  
129 16;15(19):4096-4114, PMID: 28352916; PMCID: PMC5472064.

130 4 Kellogg GE, Marabotti A, Spyrakis F, Mozzarelli A. HINT, a code for understanding the interaction  
131 between biomolecules: a tribute to Donald J. Abraham. *Front Mol Biosci*. 2023 Jun 7;10:1194962. PMID:  
132 37351551; PMCID: PMC10282649.

### 133 **Molecular docking to M<sup>pro</sup>**

134 To determine the feasibility of covalent binding of compounds of interest at the identified Cys300  
135 pocket, these compounds were covalently docked by virtual modeling onto the SARS-CoV-2 main protease  
136 crystal structure. Maestro 12.7 (Schrödinger, Inc.) was used to prepare the template M<sup>pro</sup> crystal structure  
137 of PDB:7AXM and the Covalent Docking module was used to model the covalent ligand-protein  
138 complex using the Reactive Residue set at Cys300, Reaction Type (Disulfide Formation), and Docking  
139 Mode set at Virtual Screening.

140 **Compounds and Reagents**

141 ACV tripeptide, zofenoprilat, epicaptropril, bicusate were from BOC Sciences (Shirely, NY),  
142 phosphopantetheine, DL-thiorphan, captopril, R-dihydrolipoic acid and hydrocortisone were from Sigma-  
143 Aldrich (St Louis, MO), omapatrilat, emerimide were from Cayman Chemicals (Ann Arbor, MI), tixocortol,  
144 and tixocortol pivalate were from Medical Isotopes Inc. (Pelham, NH) and bucilliamine was from AK  
145 Scientific (Union City, CA) Nirmatrelvir (NM) was from Med Chem Express (Monmouth Junction, NJ) . All  
146 compounds were dissolved in 100% cell culture-grade DMSO from Sigma (St Louis, MO) and stored as 10-  
147 20 mM stock solutions at -20°C until use. TKB-198, 5H, and GRL-0920 were obtained as described  
148 previously<sup>1-3</sup> and stored as stocks in 100% DMSO. Ammonium hydrogen carbonate for use in SEC/MS  
149 chromatography was obtained from Millipore (Oakville, Ontario, CA). Formic acid and trifluoroacetic acid  
150 were from Pierce Chemical company (Rockford, IL). Tris(2-carboxyethyl) phosphine hydrochloride (TCEP)  
151 solution, dithiothreitol (DTT), and reduced glutathione (GSH) were from Sigma. Sequencing grade  
152 chymotrypsin and AccuMAP Low pH Digestion kit was from Promega (Madison, WI). The disulfide of TX  
153 was generated by incubation of TX at 1 mM in HEPES buffer pH 7.8 and 10% DMSO overnight at 35°C. The  
154 resultant precipitate was dissolved in 100% DMSO and then run on RP-HPLC to purify TSST from remaining  
155 TX using a Vydac C18 column and a 2% ACN gradient.

156 **Screening assay for M<sup>pro</sup> inhibitory activity and determination of M<sup>pro</sup> covalent modification.**

157 For the screening procedure, M<sup>pro</sup> activity was measured using a peptide based (TSAVLQSGFRKM)  
158 HPLC assay using 100 nM M<sup>pro</sup> and 50 μM of each drug (see Table S1). Drugs were incubated for 1 h then  
159 the assay was started with addition of peptide substrate and stopped after 10 minutes. Products were  
160 determined by measuring their absorbance at 205. Control was 5% DMSO and all samples contained 5%  
161 DMSO in assay. Further assays involving kinetics and further characterization were performed the same  
162 except 50 nM M<sup>pro</sup> was used in these assays. For assessing covalent modification, each compound (50 μM  
163 in DMSO 100%) was incubated with M<sup>pro</sup> (5 μM) for 1 h in assay buffer (50 mM HEPES buffer, 1 mM EDTA,

164 50 mM NaCl pH 7.8) and then analyzed by SEC/MS for covalent modification by protein deconvolution.  
165 SEC/MS of M<sup>pro</sup> was carried out using a BioSep SEC2000 column (300 mm × 4.6 mm; Phenomenex,  
166 Torrance, CA, U.S.A.) 25 mM ammonium carbonate running buffer made fresh daily (pH adjusted to 7.5  
167 with formic acid). Samples were run on a 1200 series HPLC–MS system (Agilent, Santa Clara, CA, U.S.A.).  
168 M<sup>pro</sup> samples (1 μM-10 μM as indicated in Figures) were injected (2-10 μl) and run with an isocratic flow  
169 rate of 0.35 ml · min<sup>-1</sup> and. Where indicated, cmBSA was sometimes used as an internal standard and  
170 carrier to help prevent nonspecific binding of protein during the analysis. M<sup>pro</sup> eluting from the column  
171 was monitored using an Agilent DAD UV detector followed by a FLD detector in series with the Agilent  
172 6230 MS-TOF detector. After different treatments and preincubation times of M<sup>pro</sup> with test compounds,  
173 the eluting M<sup>pro</sup> peaks detected by the ion current from MS analysis were deconvoluted using Mass Hunter  
174 software to assess the molecular mass of M<sup>pro</sup> and to obtain evidence of covalent modification of the  
175 eluting M<sup>pro</sup> as described previously <sup>4</sup>.

#### 176 **Main Protease Kinetic Analysis**

177 Wild type and C300S main proteases were prepared and purified as described previously <sup>4</sup>. To  
178 perform Michaelis-Menten kinetics the assay was done in 96 well cell culture treated round bottom plates  
179 (Corning). The enzyme was made up as a 60 nM stock in HEPES assay buffer. Eight wells received 38 μl of  
180 enzyme solution and each well was then treated with 2 μl of DMSO for controls or 2 μl of 20X stock of TX  
181 dissolved in DMSO to bring to 1X. The plate was incubated for 1 h at 37°C and then 5X substrate stocks in  
182 HEPES assay buffer were added to give final substrate concentrations of 0.1, 0.2, 0.4, 0.8, 1.6, 3.2 and 6.4  
183 mM for the DMSO controls and inhibitor treatments. The assay was carried out at 37° C for 8 minutes  
184 (confirmed to be within the linear range of the assay to obtain initial velocities) and the assay was stopped  
185 with 10 μl of 4% TFA solution in water. Samples were assay by RP-HPLC as described above and  
186 Lineweaver-Burke (double-reciprocal plots) plots were used to calculate the values of K<sub>M</sub>, V<sub>max</sub>. and K<sub>i</sub>. The  
187 data presented represents the average of three independent experiments.



188 ***In cellulo* M<sup>pro</sup> and SARS-Cov-2 antiviral assays:**

189 Active M<sup>pro</sup> was expressed from the pcDNA3 H2B-mIFP T2A M<sup>pro</sup> (WT) plasmid (Addgene 163079).  
190 The NanoLuc plasmid containing the M<sup>pro</sup> cleavage site (AVLQSGFR) was constructed as reported by Chen  
191 et al. 2022. Briefly, a permuted NanoLuc construct in the pcDNA3.1 vector expressing amino acids 66-171  
192 in the N-terminus was linked using a linker containing the M<sup>pro</sup> cleavage site  
193 (GGGSGNGSAVLQSGFRSLKACGGG) with amino acids 2-66 of the Nanoluciferase protein in the C-terminus.  
194 The NanoLuc construct was codon-optimized for mammalian expression. One hundred thousand early  
195 passage healthy cells were plated in each well of a 12-well plate and transfected 24 h later with FUGENE6  
196 (Promega). A ratio of 1:3:3 (NanoLuc:Mpro:Bgal) of plasmid was used for transfection along with pcDNA3  
197 as carrier DNA for maintaining transfection efficiency. Briefly, in each well of the 12-well plate, 80 ng of  
198 NanoLuc, 240 ng of Mpro, and 240 ng of the beta-gal control vector were transfected. Inhibitors were  
199 added to the cells 20 h post-transfection and assayed for NanoLuc activity 46 h post-inhibitor treatment.

200 For SARS-CoV-2 replication assays, HeLa-Ace2 cells obtained from Creative Biogene (Shirley, NY)  
201 were seeded into 384-well tissue culture treated plates at 6,000 per well in 30  $\mu$ L DMEM (Gibco,  
202 Gaithersburg, MD, USA) supplemented with 10% fetal bovine serum (FBS; Sigma, St. Louis, MO, USA) the  
203 day prior to infection. One hor 18 hrs before infection, compounds (dissolved in DMSO) were digitally  
204 dispensed directly into cell plates using a Tecan D300e digital dispenser to generate a twelve-point dose  
205 curve for each compound, replicated in quadruplicate (n = 4). Under biocontainment conditions, SARS-  
206 CoV-2 virus (WA-01) was diluted in DMEM with 10% FBS to a concentration of 3,000 plaque forming units  
207 (PFU) per 20  $\mu$ L (60,000 PFU/mL) (MOI of 2). This inoculum was added to the assay plates for a final assay  
208 volume of 50  $\mu$ L. Plates were fixed in 10% neutral buffered formalin 18 hours post-infection; Upon  
209 removal from biocontainment, cells were stained with a SARS-CoV/SARS-CoV-2 nucleoprotein-specific  
210 primary antibody followed by secondary antibody conjugated to Alexa647 fluorophore. Hoechst dye was  
211 added for detection of cell nuclei. Fluorescence readout was quantitated using a PerkinElmer Operetta

212 high-content imaging system. Cytotoxicity on mock-infected plates was determined using the Promega  
213 Cell Titer-Glo Luminescent Cell Viability Assay (Catalog #G7571) at the time of fixation of the infected  
214 plate. Half-maximal inhibitory concentration ( $IC_{50}$ ) and 50% cytotoxic concentration ( $CC_{50}$ ) were calculated  
215 using GraphPad Prism Software (La Jolla, CA). Z' factor scores were assessed as quality-control parameters  
216 for each plate.

#### 217 **Determination of TP metabolic fate when added to serum or cells:**

218 To determine if TP is converted to TX under various conditions, we incubated TP (50  $\mu$ M)  
219 in water, DMEM, DMEM supplemented with heat inactivated serum or DMEM with 10% serum that was  
220 not heat inactivated. Following an 18 h incubation overnight at 37°C the samples were acidified with 0.2%  
221 TFA to stop the reaction and then diluted with DMSO to give a final of 50% DMSO. This was done to ensure  
222 solubility of the compounds prior to RP/HPLC/MS analysis. The samples were treated with 10 mM TCEP  
223 for 15 min (to reduce and disulfide bound TX or TSST in the samples) and then separated on a VyDac C18  
224 column 5205 and the amount of TP and TX was determined based on the elution time and molecular mass  
225 obtained with the standards. To assess the conversion of TP by cells, HeLa cells were plated overnight and  
226 then cells were treated with TP (50  $\mu$ M). Cells were then extracted for metabolites after 1, 4, 24, and 48  
227 hincubation. Cells were washedwith PBS the cells were then trypsinized followed by three washes with  
228 PBS. The pellet was then extracted with 60% methanol solution/0.2% TFA and heated at 95 degrees for 5  
229 minutes. Cellular debris was removed by centrifugation and the methanolic/TFA solution dried by speed  
230 vac to dryness. The residue was dissolved in 100% DMSO and analyzed by RP-HPLC/MS. Shown are the  
231 levels of TP, TX, TSSG and the disulfide of TX.

#### 232 **Purification of tixocortol disulfide (TSST).**

233 To purify tixocortol disulfide for use in M<sup>pro</sup> assays, TX was first incubated in HEPES assay buffer  
234 pH 7.8 in 5% DMSO. The reaction was left to go overnight at 37°C. TSST precipitated from the buffer and  
235 was pelleted and then redissolved in 100% DMSO. The solution was then separated on a VyDac C18  
236 column 5205 and the eluting TSST as identified by its mass obtained from MS analysis was collected in  
237 eppendorph tubes. The eluates were then dried down in a speed Vac concentrator, incubated with  
238 methanol to remove volatiles and dried again. The powder was redissolved in 100% DMSO. The TSST could  
239 be converted to TX with 10 mM TCEP and then the concentration determined by comparison to a known  
240 concentration of YTX standard. The TSST in DMSO was stored at -70°C until use.

#### 241 **Preparation of M<sup>pro</sup> TX for chymotryptic digestion and RP-HPLC/MS analysis.**

242 To determine which cysteines of M<sup>pro</sup> were modified by tixocortol treatment, we first prepared  
243 TX- modified M<sup>pro</sup> (TX-M<sup>pro</sup>). M<sup>pro</sup> was first pretreated with 10 mM TCEP to ensure full reduction of the 12  
244 cysteines and the correct native mass was verified by SEC/MS analysis as described above. The TCEP was  
245 removed by washing through an Amicon 10 kDa cutoff membrane three times using 50 mM HEPES buffer  
246 pH 7.8 with 1 mM EDTA, 10% DMSO and 50 mM NaCl. Protease was set at 1 µM and TX was added at a  
247 final concentration of 200 µM and incubated at 35°C for 1 h (total volume 3.5 ml). The preparation was  
248 then concentrated using a 10 kDa membrane and washed three times with HEPES buffer pH 7.2 with 1  
249 mM EDTA, 10% DMSO to remove the residual unbound TX. The TX-M<sup>pro</sup> preparation was analyzed by  
250 SEC/MS to determine the extent of TX modification. To determine which cysteines were modified by TX,  
251 we carried out chymotryptic digestions as described previously using the AccuMAP Low pH Digestion kit  
252 from Promega<sup>4</sup>. Briefly, 20 µg of TX-M<sup>pro</sup> was alkylated with NEM in 8 M urea, concentrated by filtration,  
253 and put up in final 1 M urea pH 8 in Tris and CaCl<sub>2</sub> buffer. The alkylated preparation in 1 M urea was  
254 digested with chymotrypsin (1 µg/ml in 1 mM HCl) at 28°C overnight. The solution was stopped with a  
255 final of 2% TFA. The samples were then applied to C18 spin columns and after washing, the peptides were  
256 eluted with acetonitrile. Peptide samples were put up into RP-HPLC running buffer (0.1% FA/0.02% TFA).

257 The peptide samples, treated without or with 10 mM TCEP as well as the corresponding peptide standards  
258 and TX-modified peptide standards were analyzed by RP-HPLC/MS as described previously <sup>4</sup>.

259

- 260 1. N. Higashi-Kuwata, K. Tsuji, H. Hayashi, H. Bulut, M. Kiso, M. Imai, H. Ogata-Aoki, T. Ishii,  
261 T. Kobayakawa, K. Nakano, N. Takamune, N. Kishimoto, S. I. Hattori, D. Das, Y. Uemura,  
262 Y. Shimizu, M. Aoki, K. Hasegawa, S. Suzuki, A. Nishiyama, J. Saruwatari, Y. Shimizu, Y.  
263 Sukenaga, Y. Takamatsu, K. Tsuchiya, K. Maeda, K. Yoshimura, S. Iida, S. Ozono, T.  
264 Suzuki, T. Okamura, S. Misumi, Y. Kawaoka, H. Tamamura and H. Mitsuya, Identification  
265 of SARS-CoV-2 M(pro) inhibitors containing P1' 4-fluorobenzothiazole moiety highly  
266 active against SARS-CoV-2, *Nat Commun*, 2023, **14**, 1076.
  - 267 2. K. Tsuji, T. Ishii, T. Kobayakawa, N. Higashi-Kuwata, C. Azuma, M. Nakayama, T. Onishi,  
268 H. Nakano, N. Wada, M. Hori, K. Shinohara, Y. Miura, T. Kawada, H. Hayashi, S. I. Hattori,  
269 H. Bulut, D. Das, N. Takamune, N. Kishimoto, J. Saruwatari, T. Okamura, K. Nakano, S.  
270 Misumi, H. Mitsuya and H. Tamamura, Potent and biostable inhibitors of the main  
271 protease of SARS-CoV-2, *iScience*, 2022, **25**, 105365.
  - 272 3. S. I. Hattori, N. Higashi-Kuwata, H. Hayashi, S. R. Allu, J. Raghavaiah, H. Bulut, D. Das, B.  
273 J. Anson, E. K. Lendy, Y. Takamatsu, N. Takamune, N. Kishimoto, K. Murayama, K.  
274 Hasegawa, M. Li, D. A. Davis, E. N. Kodama, R. Yarchoan, A. Wlodawer, S. Misumi, A. D.  
275 Mesecar, A. K. Ghosh and H. Mitsuya, A small molecule compound with an indole  
276 moiety inhibits the main protease of SARS-CoV-2 and blocks virus replication, *Nat*  
277 *Commun*, 2021, **12**, 668.
  - 278 4. D. A. Davis, H. Bulut, P. Shrestha, A. Yaparla, H. K. Jaeger, S. I. Hattori, P. T. Wingfield, J.  
279 J. Mieyal, H. Mitsuya and R. Yarchoan, Regulation of the Dimerization and Activity of  
280 SARS-CoV-2 Main Protease through Reversible Glutathionylation of Cysteine 300, *mBio*,  
281 2021, **12**, e0209421.
- 282
